# Supplementary material
Source: Springer Nature journal article supplement (https://www.springermedizin.de/resource/supplementary/12889_2009_2194_MOESM5_ESM.pdf/9484916)

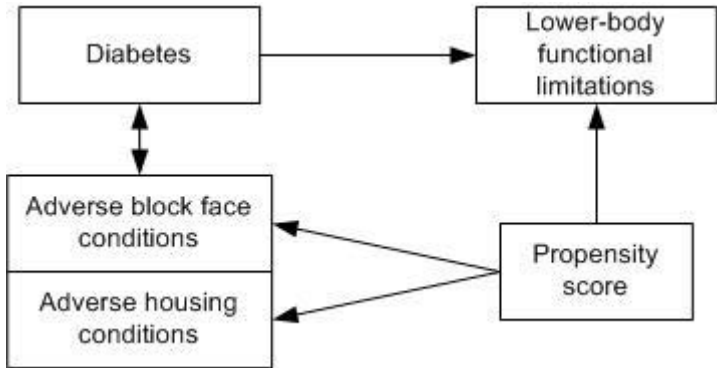

Supplement: MOESM5 [file 9484916]
